# Supplementary material
Source: PubMed Central journal article supplement (PMC3136639)
Supplement: NIHMS280295-supplement-supplement_1.pdf [file NIHMS280295-supplement-supplement_1.pdf]

## Figure Legends

**Figure 1. Comparison of HPV DNA viral load and abundance of HPV-derived transcripts for established HPV-driven cancers versus normal skin and cuSCCs.** (A) HPV DNA viral loads determined by type-specific qPCR. For each sample with multiple type infection, the sum of the type-specific viral loads is shown (for details, see Table 2.) (B) Abundance of HPV-derived transcripts determined by mRNA-seq. Reads were filtered to remove host-derived and low-complexity sequence prior to viral mapping (see methods), and HPV counts are each presented as a percentage of their total dataset. The most frequently matched HPV type for the HeLa, periungual SCC, and cervical SCC samples is indicated. Cervical cancer is presented as the union of 2 technical replicate datasets. (C) Congruence between HPV genomic load (blue; presented as in panel A) and abundance of HPV-derived transcripts (red; presented as in panel B) among those control samples from which both types of data were collected.

**Supplemental Table S1.** Primers for Viral Load qPCR.

**Supplemental Table S2.** mRNA-seq Read Counts.

**Supplemental File S1.** Putatively complete sequence of *Xenopus* EF1A-derived contaminating transcript.

**Supplemental File S2.** Composition of viral sequences. Shown are the top ten viruses with the greatest number of read matches from each dataset.

**Supplemental File S3.** Viral genome database records.

## SUPPLEMENTAL INFORMATION

**Transcriptome Sequencing Demonstrates that Human Papillomavirus is not Active in Cutaneous Squamous Cell Carcinoma**

Sarah Tuttleton Arron\*, J. Graham Ruby\*, Eric Dybbro, Don Ganem, Joseph L. DeRisi

*\*These authors contributed equally to this work.*

|                                                                                                                                                                 |         |
|-----------------------------------------------------------------------------------------------------------------------------------------------------------------|---------|
| Table S1. Primers for viral load qPCR                                                                                                                           | page 2  |
| Table S2. mRNA-seq read counts                                                                                                                                  | page 3  |
| Supplemental File S1. Putatively complete sequence of the Xenopus EF1A-derived contaminating transcript, including putatively vector-derived promoter sequence. | page 4  |
| Supplemental File S2. Composition of viral sequences. The ten viruses with the greatest number of read matches from are shown for each dataset.                 | page 5  |
| Supplemental File S3. Viral genome database records (do not print: read/search/zoom on your computer).                                                          | page 12 |

Table S1. Primers for viral load qPCR

| Primer                         | Sequence                                               | UPL Probe | Amplicon length |
|--------------------------------|--------------------------------------------------------|-----------|-----------------|
| Genomic B2MF<br>Genomic B2MR   | CAGTAGTTTCCCTGCAGTTGAG<br>TGTATATGTATTTGTGCAAGTGCTG    | Probe 32  | 60nt            |
| UPL-HPV5F<br>UPL-HPV5R         | GGCACTCGGCTAATGGTAAA<br>TCATCGGTGCTTTGGACTC            | Probe 31  | 70nt            |
| UPL-HPV8F-2<br>UPL-HPV8R-2     | TTCCCTGGATTTGGATCAAT<br>TCTGTTGCAAACCTGCTTGA           | Probe 4   | 65nt            |
| UPL-HPV9F<br>UPL-HPV9R         | TTGGGCCTGTAGAGGTATTGA<br>GGTGACCTGATGTTCCAACC          | Probe 13  | 65nt            |
| UPL-HPV16F<br>UPL-HPV16R       | CTGGAATTTTGGTCTACAACCTC<br>AGCAATTGCCTGGGTTACAA        | Probe 79  | 76nt            |
| UPL-HPV17F<br>UPL-HPV17R       | GGAAGATTAGTTTGGGCATGT<br>CCTGTAGTGCTACACCTAATGG        | Probe 153 | 72nt            |
| UPL-HPV18F-2<br>UPL-HPV18R-2   | TGGTAGATTTTATTGATACACAAGGAA<br>ATGGAACAATGCCTGTGCT     | Probe 13  | 74nt            |
| UPL-HPV19F<br>UPL-HPV19R       | TGGCAAGCAGCTAGTGGTAA<br>TTGTACCTTGGCAACTGGT            | Probe 31  | 61nt            |
| UPL-HPV20F<br>UPL-HPV20R       | TAATAGGCTGTGCCCCATGT<br>ACGTCGTCTGCACATGGTAA           | Probe 123 | 64nt            |
| UPL-HPV21F<br>UPL-HPV21R       | TGATGAGGGTAGTATGAAGAATGC<br>GGAGTTACCAATCTGTACTGTGC    | Probe 31  | 76nt            |
| UPL-HPV49F<br>UPL-HPV49R       | GGACGCTGCTAAACCTTGTG<br>AATTCCTAATGGAGGGCATTACC        | Probe 159 | 60nt            |
| UPL-HPV75F<br>UPL-HPV75R       | TGGTTACCTACAACCTGGTAAGGTTT<br>TGTATTCATCCGTGCTTTGC     | Probe 31  | 76nt            |
| UPL-HPV80F<br>UPL-HPV80R       | CCCTGTTTAGGGGAACATTG<br>GGACATTTTCCAGCTTGGTT           | Probe 128 | 74nt            |
| UPL-HPV96F<br>UPL-HPV96R       | TGGTTGTCAACAACGGGTAA<br>CTTTGCACCCTGGCAACT             | Probe 157 | 62nt            |
| UPL-FA7F<br>UPL-FA7R           | TTTGGGCTATCAGAGGTATGG<br>TGACCCGATGTTCTACACC           | Probe 13  | 64nt            |
| UPL-FA14F<br>UPL-FA14R         | TGTTTATTATTGGCTGTACTCCATGT<br>GCTTGATCATCATTAACACATGCT | Probe 123 | 76nt            |
| UPL-FA16.3F-2<br>UPL-FA16.3R-2 | CAGGCCACCCACTATTTAACA<br>TCAAATGAAACATTTTGTCTGTCA      | Probe 4   | 94nt            |
| UPL-FA37F<br>UPL-FA37R         | CTGAAGGATACTGAAAAAGTAATCAA<br>GGTATTTTGTCTGTCATCTTTGGA | Probe 31  | 63nt            |
| UPL-FA123F<br>UPL-FA123R       | TGGTTGCACACCTTGCTTAG<br>CCCTAGTTGGCTACCTGCAT           | Probe 128 | 73nt            |
| UPL-FA127F<br>UPL-FA127R       | ACCATGTATTGGTGAACATTGG<br>TGGGCAACTACCTTGTGAA          | Probe 92  | 70nt            |
| UPL-FA140.2F<br>UPL-FA140.2R   | GGCTGTGTACCTTGTATTGGAGA<br>GCCTGTTTGATTGTTTTGTTCA      | Probe 92  | 75nt            |
| UPL-HPV16F<br>UPL-HPV16R       | CTGGAATTTTGGTCTACAACCTC<br>AGCAATTGCCTGGGTTACAA        | Probe 79  | 76nt            |

Table S2. mRNA-seq read counts

| Sample ID  | Technical replicate | Description    | Immuno-suppression | Dataset ID | Barcode | Total Reads | Host-filtered | Complexity-filtered | HPV-matching | % of reads that match HPV |
|------------|---------------------|----------------|--------------------|------------|---------|-------------|---------------|---------------------|--------------|---------------------------|
| HeLa       |                     | HeLa           | NA                 | C          | AAA     | 1846552     | 6656          | 4847                | 2836         | 0.154                     |
| ILS19363-1 | X                   | Cervical SCC   | NA                 | C          | ACC     | 3964812     | 55934         | 24412               | 862          | 0.022                     |
| ILS19363-2 | X                   | Cervical SCC   | NA                 | C          | AGG     | 1010254     | 3344          | 2666                | 186          | 0.018                     |
| STA01-002  |                     | KA             | No                 | A          | CAC     | 3085730     | 8884          | 6422                | 0            | 0                         |
| STA01-009  |                     | SCC            | Yes                | A          | CCA     | 3912414     | 8774          | 7006                | 0            | 0                         |
| STA01-010  |                     | SCC            | Yes                | A          | CGT     | 3553510     | 11270         | 8300                | 0            | 0                         |
| STA01-012  |                     | KA             | No                 | B          | AAA     | 3875122     | 150878        | 116866              | 0            | 0                         |
| STA01-018  |                     | SCC            | Yes                | B          | ACC     | 3682590     | 16842         | 14294               | 0            | 0                         |
| STA01-021  |                     | SCC            | Yes                | A          | CTG     | 4005306     | 12796         | 10001               | 0            | 0                         |
| STA01-027  |                     | SCC            | Yes                | B          | AGG     | 1948194     | 53300         | 46304               | 0            | 0                         |
| STA01-030  |                     | SCC            | Yes                | A          | GAG     | 4516312     | 11962         | 9643                | 0            | 0                         |
| STA01-035  |                     | Periungual SCC | No                 | C          | TTA     | 1564822     | 41212         | 35843               | 916          | 0.059                     |
| STA01-039  |                     | SCC            | Yes                | B          | ATT     | 3907712     | 20664         | 17888               | 0            | 0                         |
| STA01-040  |                     | KA             | No                 | B          | CAC     | 4427628     | 25678         | 20228               | 0            | 0                         |
| STA01-048  |                     | KA             | No                 | B          | CGT     | 5506880     | 97680         | 80882               | 0            | 0                         |
| STA01-050  |                     | SCC            | Yes                | A          | GCT     | 4362932     | 10526         | 8431                | 0            | 0                         |
| STA01-063  |                     | SCC            | No                 | B          | CTG     | 6276264     | 55170         | 48112               | 0            | 0                         |
| STA01-064  |                     | SCC            | Yes                | B          | GAG     | 2752572     | 20312         | 17032               | 0            | 0                         |
| STA01-066  |                     | SCC            | Yes                | A          | GGA     | 3518100     | 11154         | 8280                | 0            | 0                         |
| STA01-070  |                     | SCC            | Yes                | A          | GTC     | 4612652     | 11300         | 8458                | 0            | 0                         |
| STA01-074  |                     | SCC            | Yes                | B          | GCT     | 3540808     | 24170         | 18950               | 0            | 0                         |
| STA01-076  |                     | Normal skin    | Yes                | C          | GTC     | 3036090     | 11122         | 8966                | 0            | 0                         |
| STA01-077  |                     | KA             | Yes                | C          | TAT     | 2035404     | 242506        | 215066              | 0            | 0                         |
| STA01-082  |                     | KA             | Yes                | A          | TAT     | 4008340     | 8910          | 6868                | 0            | 0                         |
| STA01-084  |                     | KA             | No                 | B          | GGA     | 3693034     | 71668         | 29343               | 0            | 0                         |
| STA01-091  |                     | KA             | Yes                | A          | TCG     | 3380424     | 11142         | 7884                | 0            | 0                         |
| STA01-093  |                     | SCC            | Yes                | A          | TGC     | 2636032     | 6346          | 4848                | 0            | 0                         |
| STA01-094  |                     | Normal skin    | Yes                | C          | ATT     | 4682778     | 26458         | 22058               | 0            | 0                         |
| STA01-095  |                     | SCC            | Yes                | A          | ACC     | 1968238     | 13838         | 7181                | 0            | 0                         |
| STA01-096  |                     | SCC            | Yes                | C          | TCG     | 3006402     | 26182         | 16153               | 0            | 0                         |
| STA01-097  |                     | KA             | No                 | A          | AAA     | 1484220     | 4370          | 2917                | 0            | 0                         |
| STA01-098  |                     | Normal skin    | No                 | C          | CAC     | 3223856     | 56506         | 53292               | 0            | 0                         |
| STA01-099  |                     | SCC            | Yes                | A          | TTA     | 2772406     | 4266          | 3269                | 0            | 0                         |
| STA01-103  | X                   | KA             | Yes                | A          | ATT     | 3800810     | 17250         | 11110               | 0            | 0                         |
| STA01-103  | X                   | KA             | Yes                | B          | GTC     | 6799664     | 38188         | 34433               | 0            | 0                         |
| STA01-104  |                     | Normal skin    | Yes                | C          | TGC     | 3585240     | 20916         | 10031               | 0            | 0                         |
| STA01-106  |                     | SCC            | No                 | C          | GCT     | 3566928     | 49370         | 29962               | 5            | 1.4E-4                    |
| STA01-107  |                     | Normal skin    | No                 | C          | GGA     | 5654574     | 126742        | 51461               | 0            | 0                         |
| STA01-121  |                     | SCC            | Yes                | C          | CCA     | 2872454     | 47724         | 23374               | 0            | 0                         |
| STA01-122  |                     | Normal skin    | Yes                | C          | CGT     | 2609150     | 33690         | 23698               | 2            | 7.7E-05                   |
| STA01-124  |                     | SCC            | Yes                | B          | TCG     | 2334832     | 17670         | 14925               | 0            | 0                         |
| STA01-125  |                     | Normal skin    | Yes                | C          | GAG     | 5906058     | 30702         | 18292               | 0            | 0                         |
| STA01-126  |                     | SCC            | No                 | B          | TGC     | 3428906     | 21586         | 17737               | 0            | 0                         |
| STA01-127  |                     | Normal skin    | No                 | C          | CTG     | 3342170     | 9108          | 5534                | 0            | 0                         |

**Supplemental File S1.** Putatively complete sequence of the *Xenopus* EF1A-derived contaminating transcript, including putatively vector-derived promoter sequence.

GGGAGACTCGAGAATTACCTCACTAAAGGGAGGTACCGGGATGCATGAAATCCGCCGG  
TGAGTTCTAACTATCCACCGCCAAACATCTAATCCACAATGGGAAAGGAAAAGACTCACA  
TCAACATCGTTTGTCTATGGACACGTAGATTCTGGAAAGTCCACAACAACCTGGACATCTGA  
TCTACAAATGTGGTGGTATCGACAAGAGAACCATCGAAAAGTTCGAGAAGGAAGCTGCTG  
AGATGGGAAAAGGCTCCTTCAAGTATGCCTGGGTCTTGGACAAACTGAAGGCCGAGCGTG  
AACGTGGTATTACCATTGACATCTCCCTGTGGAAATTTGAGACCAGCAAATACTATGTCA  
CTATCATTGATGCTCCTGGACACAGAGATTTTCATCAAGAACATGATCACTGGTACTTCTC  
AGGCTGACTGTGTCTGCTGATTGTTGCTGCTGGTGTGGTGAATTTGAAGCTGGTATCT  
CAAAGAATGGACAAACCCGTGAGCATGCCCTCCTTGCCCTACACTCTGGGTGTAAAACAGC  
TGATCGTTGGTATTAACAAGATGGATTCCACTGAACCCCATACAGTCAGAAAAGATATG  
AGGAAATTGTAAAGGAAGTCAGCACATACATCAAGAAGATTGGTTACAACCCGTGACACTG  
TTGCCTTTGTACCTATTTCTGGATGGAACGGTGACAACATGCTTGAGCCTAGCCCCAATA  
TGCCATGGTTTAAAGGATGGAATAACCCGTAAAGAAGGATCTGGCAGCGGAACATACCC  
TGCTGGAAGCTCTTGACTGCATTCTGCCACCTAGTCGCCCAACTGATAAGCCTCTCCGTC  
TGCCTCTGCAGGATGTCTACAAAATTGGCGGTATTGGTACTGTACCAGTTGGTCGTGTGG  
AAACTGGTGCTATTAACACAGGCATGGTGGTTACCTTTGCCCTGTTAATGTAACAACCTG  
AAGTGAAATCTGTTGAAATGCACCATGAAGCCCTTACTGAGGCCGTGCCCGTGACAACG  
TCGGCTTTAACGTCAGAACGTTTCCGTGAAGGACGTCCGTCGTGGCAACGTTGCTGGTG  
ACAGCAAGAATGACCCACCAATGGAAGCTGGTTCTTTTACCGCACAGGTATCATCCTGA  
ATCACCAGGCCAGATTGGTGCTGGATATGCCCCGTGTGTTGGATTGCCACACTGCTCACA  
TTGCTTGCAAGTTTGCTGAGCTAAAGGAGAAGATTGATCGCCGTTCTGGTAAGAACTGG  
AAGACAATCCCAAGTTCTGAAAGTCTGGAGATGCTGCCATTGTTGACATGATCCCAGGAA  
AGCCAATGTGCGTGGAGAGCTTCTCAGACTACCCCTCCTCTTGGTCGTTTGTCTGTCCTGTG  
ACATGAGGCAGACTGTTGCCGTAGGAGTCATCAAGGCAGTGGAAGAAGGAGCAGCAGGAT  
CTGGCAAAAGTCACAAAGTCTGCTCAGAAAGCAGCGAAAACCAATGAATATTTCCAGAGT  
CTCTCACCTCAGTCATAACCAAGTGGTGGAGGATTGGTCTCAGAACTCTTTCTATCAATTG  
GCCATCAGAGTTTAAATAGTAAAGACTGGTTAATGATTACAATGCATCGCAAGAGCTTCA  
GAAGGAAAAAATGCTTGTGGACACATTTGTTTGTGGCAGTTTAAAGTTATTAGTGTGTTT  
AAATCCAGTAATTTCTAAATGGAAGCAAATTGACCAAAATCTGTCACCAAAATTTGAGACC  
ATTAAAAAATTGAAAAGATAAAAAAAAAAAAAAAAAAAAAAAAAAAAAAAAAAAAAA

**Supplemental File S2.** Composition of viral sequences. The ten viruses with the greatest number of read matches from are shown for each dataset.

### Dataset A, barcode AAA

Number of viruses with matches: 1  
 Number of reads with viral matches: 1  
 Percent of total dataset: 0.00007%

###

Top viral matches (genome GI, match-normalized read count, virus description):

46401626 1.0 Enterobacteria phage P1  
 Total shown: 1.0

### Dataset A, barcode ACC

Number of viruses with matches: 1  
 Number of reads with viral matches: 1  
 Percent of total dataset: 0.00005%

###

Top viral matches (genome GI, match-normalized read count, virus description):

148727082 1.0 Propionibacterium phage PA6  
 Total shown: 1.0

### Dataset A, barcode ATT

Number of viruses with matches: 6  
 Number of reads with viral matches: 100  
 Percent of total dataset: 0.003%

###

Top viral matches (genome GI, match-normalized read count, virus description):

254305431 94.0 Human klassevirus 1  
 31880044 2.0 Enterobacteria phage SP6  
 253761958 1.0 Salivirus NG-J1: ssRNA positive-strand viruses, no DNA stage; Picornavirales; Picornaviridae.  
 164519195 1.0 Helicoverpa armigera granulovirus: dsDNA viruses, no RNA stage; Baculoviridae; Betabaculovirus  
 134288688 1.0 Burkholderia phage phiE12-2  
 46401626 1.0 Enterobacteria phage P1  
 Total shown: 100.0

### Dataset A, barcode CAC

Number of viruses with matches: 0  
 Number of reads with viral matches: 0  
 Percent of total dataset: 0%

### Dataset A, barcode CCA

Number of viruses with matches: 1  
 Number of reads with viral matches: 1  
 Percent of total dataset: 0.00003%

###

Top viral matches (genome GI, match-normalized read count, virus description):

28876202 1.0 Streptococcus prophage 315.2  
 Total shown: 1.0

### Dataset A, barcode CGT

Number of viruses with matches: 7  
 Number of reads with viral matches: 16  
 Percent of total dataset: 0.0005%

###

Top viral matches (genome GI, match-normalized read count, virus description):

17059637 8.0 Zucchini yellow mosaic virus: ssRNA positive-strand viruses, no DNA stage; Potyviridae; Potyvirus  
 154551150 3.0 Antheraea pernyi nucleopolyhedrovirus: dsDNA viruses, no RNA stage; Baculoviridae; Alphabaculovirus.  
 9627728 2.0 Potato virus Y  
 73852470 1.0 Emilia huxleyi virus 86: dsDNA viruses, no RNA stage; Phycodnaviridae; Coccolithovirus  
 9633628 1.0 Japanese yam mosaic virus: ssRNA positive-strand viruses, no DNA stage; Potyviridae; Potyvirus  
 139424470 0.5 Human herpesvirus 4  
 82503188 0.5 Human herpesvirus 4 type 1  
 Total shown: 16.0

### Dataset A, barcode CTG

Number of viruses with matches: 0  
 Number of reads with viral matches: 0  
 Percent of total dataset: 0%

### Dataset A, barcode GAG

Number of viruses with matches: 0  
 Number of reads with viral matches: 0  
 Percent of total dataset: 0%

### Dataset A, barcode GCT

Number of viruses with matches: 0  
 Number of reads with viral matches: 0  
 Percent of total dataset: 0%

**Supplemental File S2 (continued).** Composition of viral sequences. The ten viruses with the greatest number of read matches from are shown for each dataset.

### Dataset A, barcode GGA

Number of viruses with matches: 0  
 Number of reads with viral matches: 0  
 Percent of total dataset: 0%

### Dataset A, barcode GTC

Number of viruses with matches: 1  
 Number of reads with viral matches: 1  
 Percent of total dataset: 0.00002%

###

Top viral matches (genome GI, match-normalized read count, virus description):

227811306 1.0 Thermus phage IN93  
 Total shown: 1.0

### Dataset A, barcode TAT

Number of viruses with matches: 1  
 Number of reads with viral matches: 1  
 Percent of total dataset: 0.00002%

###

Top viral matches (genome GI, match-normalized read count, virus description):

56692908 1.0 Pseudomonas phage F116  
 Total shown: 1.0

### Dataset A, barcode TCG

Number of viruses with matches: 1  
 Number of reads with viral matches: 1  
 Percent of total dataset: 0.00003%

###

Top viral matches (genome GI, match-normalized read count, virus description):

73852470 1.0 Emiliania huxleyi virus 86: dsDNA viruses, no RNA stage; Phycodnaviridae; Coccolithovirus  
 Total shown: 1.0

### Dataset A, barcode TGC

Number of viruses with matches: 1  
 Number of reads with viral matches: 1  
 Percent of total dataset: 0.00004%

###

Top viral matches (genome GI, match-normalized read count, virus description):

46401626 1.0 Enterobacteria phage P1  
 Total shown: 1.0

### Dataset A, barcode TTA

Number of viruses with matches: 0  
 Number of reads with viral matches: 0  
 Percent of total dataset: 0%

### Dataset B, barcode AAA

Number of viruses with matches: 41  
 Number of reads with viral matches: 234  
 Percent of total dataset: 0.006%

###

Top viral matches (genome GI, match-normalized read count, virus description):

46401626 50.0 Enterobacteria phage P1  
 254305431 44.0 Human klassevirus 1  
 9626243 32.0 Enterobacteria phage lambda  
 41057278 22.0 Enterobacteria phage Sf6  
 209447126 12.0 Stx2-converting phage 1717  
 212499705 6.5 Bacteriophage APSE-2  
 9633550 6.5 Acyrthosiphon pisum bacteriophage APSE-1  
 14251125 6.0 Lactococcus phage BK5-T  
 9627425 6.0 Enterobacteria phage T7  
 80159686 4.0 Clostridium phage c-st  
 Total shown: 189.0

### Dataset B, barcode ACC

Number of viruses with matches: 2  
 Number of reads with viral matches: 2  
 Percent of total dataset: 0.00005%

###

Top viral matches (genome GI, match-normalized read count, virus description):

9634155 1.0 Enterobacteria phage HK97  
 9626243 1.0 Enterobacteria phage lambda  
 Total shown: 2.0

**Supplemental File S2 (continued).** Composition of viral sequences. The ten viruses with the greatest number of read matches from are shown for each dataset.

### Dataset B, barcode AGG

Number of viruses with matches: 1  
 Number of reads with viral matches: 2  
 Percent of total dataset: 0.0001%

###

Top viral matches (genome GI, match-normalized read count, virus description):

9629914 2.0 Simian-Human immunodeficiency virus  
 Total shown: 2.0

### Dataset B, barcode ATT

Number of viruses with matches: 2  
 Number of reads with viral matches: 4  
 Percent of total dataset: 0.0001%

###

Top viral matches (genome GI, match-normalized read count, virus description):

73852470 3.0 Emiliana huxleyi virus 86: dsDNA viruses, no RNA stage; Phycodnaviridae; Coccolithovirus  
 162135082 1.0 Pseudomonas phage YuA  
 Total shown: 4.0

### Dataset B, barcode CAC

Number of viruses with matches: 1  
 Number of reads with viral matches: 1  
 Percent of total dataset: 0.00002%

###

Top viral matches (genome GI, match-normalized read count, virus description):

41057066 1.0 Orf virus: dsDNA viruses, no RNA stage; Poxviridae; Chordopoxvirinae; Parapoxvirus  
 Total shown: 1.0

### Dataset B, barcode CGT

Number of viruses with matches: 4  
 Number of reads with viral matches: 15  
 Percent of total dataset: 0.0003%

###

Top viral matches (genome GI, match-normalized read count, virus description):

73852470 9.0 Emiliana huxleyi virus 86: dsDNA viruses, no RNA stage; Phycodnaviridae; Coccolithovirus  
 254305431 4.0 Human klassevirus 1  
 9634155 1.0 Enterobacteria phage HK97  
 9626243 1.0 Enterobacteria phage lambda  
 Total shown: 15.0

### Dataset B, barcode CTG

Number of viruses with matches: 1  
 Number of reads with viral matches: 2  
 Percent of total dataset: 0.00003%

###

Top viral matches (genome GI, match-normalized read count, virus description):

9626243 2.0 Enterobacteria phage lambda  
 Total shown: 2.0

### Dataset B, barcode GAG

Number of viruses with matches: 1  
 Number of reads with viral matches: 5  
 Percent of total dataset: 0.0002%

###

Top viral matches (genome GI, match-normalized read count, virus description):

73852470 5.0 Emiliana huxleyi virus 86: dsDNA viruses, no RNA stage; Phycodnaviridae; Coccolithovirus  
 Total shown: 5.0

### Dataset B, barcode GCT

Number of viruses with matches: 0  
 Number of reads with viral matches: 0  
 Percent of total dataset: 0%

### Dataset B, barcode GGA

Number of viruses with matches: 2  
 Number of reads with viral matches: 3  
 Percent of total dataset: 0.00008%

###

Top viral matches (genome GI, match-normalized read count, virus description):

73852470 2.0 Emiliana huxleyi virus 86: dsDNA viruses, no RNA stage; Phycodnaviridae; Coccolithovirus  
 115298502 1.0 Spodoptera frugiperda ascovirus 1a: dsDNA viruses, no RNA stage; Ascoviridae; Ascovirus  
 Total shown: 3.0

**Supplemental File S2 (continued).** Composition of viral sequences. The ten viruses with the greatest number of read matches from are shown for each dataset.

### Dataset B, barcode GTC

Number of viruses with matches: 0  
 Number of reads with viral matches: 0  
 Percent of total dataset: 0%

### Dataset B, barcode TCG

Number of viruses with matches: 1  
 Number of reads with viral matches: 1  
 Percent of total dataset: 0.00004%

###  
 Top viral matches (genome GI, match-normalized read count, virus description):  
 90592717 1.0 Agrotis segetum nucleopolyhedrovirus: dsDNA viruses, no RNA stage; Baculoviridae; Alphabaculovirus.  
 Total shown: 1.0

### Dataset B, barcode TGC

Number of viruses with matches: 2  
 Number of reads with viral matches: 2  
 Percent of total dataset: 0.00006%

###  
 Top viral matches (genome GI, match-normalized read count, virus description):  
 73852470 1.0 Emiliana huxleyi virus 86: dsDNA viruses, no RNA stage; Phycodnaviridae; Coccolithovirus  
 49237297 1.0 Frog virus 3: dsDNA viruses, no RNA stage; Iridoviridae; Ranavirus  
 Total shown: 2.0

### Dataset C, barcode AAA

Number of viruses with matches: 3  
 Number of reads with viral matches: 2838  
 Percent of total dataset: 0.154%

###  
 Top viral matches (genome GI, match-normalized read count, virus description):  
 9626069 2836.0 Human papillomavirus - 18  
 230238151 1.0 Macaca fascicularis papillomavirus type 9  
 9628421 1.0 Simian virus 40: dsDNA viruses, no RNA stage; Polyomaviridae; Polyomavirus  
 Total shown: 2838.0

### Dataset C, barcode ACC

Number of viruses with matches: 1  
 Number of reads with viral matches: 862  
 Percent of total dataset: 0.022%

###  
 Top viral matches (genome GI, match-normalized read count, virus description):  
 9627100 862.0 Human papillomavirus type 16  
 Total shown: 862.0

### Dataset C, barcode AGG

Number of viruses with matches: 2  
 Number of reads with viral matches: 188  
 Percent of total dataset: 0.019%

###  
 Top viral matches (genome GI, match-normalized read count, virus description):  
 9627100 186.0 Human papillomavirus type 16  
 9626958 2.0 Moloney murine leukemia virus: Retro-transcribing viruses; Retroviridae; Orthoretrovirinae; Gammaretrovirus; Murine leukemia virus.  
 Total shown: 188.0

### Dataset C, barcode ATT

Number of viruses with matches: 13  
 Number of reads with viral matches: 43  
 Percent of total dataset: 0.0009%

###  
 Top viral matches (genome GI, match-normalized read count, virus description):  
 9626958 14.0 Moloney murine leukemia virus: Retro-transcribing viruses; Retroviridae; Orthoretrovirinae; Gammaretrovirus; Murine leukemia virus.  
 194186868 11.0 Bacillus phage phi29  
 9626205 3.0 Apple chlorotic leaf spot virus  
 228861315 2.0 Enterobacteria phage RB14  
 56718463 2.0 Enterobacteria phage M13  
 32469420 2.0 Streptococcus phage SM1  
 29366675 2.0 Enterobacteria phage T4  
 194100359 1.3333 Enterobacteria phage 13a  
 30387453 1.3333 Yersinia pestis phage phiA1122  
 9627425 1.3333 Enterobacteria phage T7  
 Total shown: 40.0

**Supplemental File S2 (continued).** Composition of viral sequences. The ten viruses with the greatest number of read matches from are shown for each dataset.

### Dataset C, barcode CAC

Number of viruses with matches: 6  
 Number of reads with viral matches: 21  
 Percent of total dataset: 0.0007%

###

Top viral matches (genome GI, match-normalized read count, virus description):

|              |      |                                                                                                                                     |
|--------------|------|-------------------------------------------------------------------------------------------------------------------------------------|
| 9626958      | 10.0 | Moloney murine leukemia virus: Retro-transcribing viruses; Retroviridae; Orthoretrovirinae; Gammaretrovirus; Murine leukemia virus. |
| 145708074    | 3.0  | Ralstonia phage phiRSA1                                                                                                             |
| 254305431    | 2.0  | Human klassevirus 1                                                                                                                 |
| 39653674     | 2.0  | Streptococcus prophage EJ-1                                                                                                         |
| 12408699     | 2.0  | Poliovirus                                                                                                                          |
| 9627425      | 2.0  | Enterobacteria phage T7                                                                                                             |
| Total shown: | 21.0 |                                                                                                                                     |

### Dataset C, barcode CCA

Number of viruses with matches: 8  
 Number of reads with viral matches: 45  
 Percent of total dataset: 0.002%

###

Top viral matches (genome GI, match-normalized read count, virus description):

|              |      |                                                                                                                                     |
|--------------|------|-------------------------------------------------------------------------------------------------------------------------------------|
| 9626958      | 16.0 | Moloney murine leukemia virus: Retro-transcribing viruses; Retroviridae; Orthoretrovirinae; Gammaretrovirus; Murine leukemia virus. |
| 19387568     | 12.0 | Spiroplasma phage 4                                                                                                                 |
| 189418893    | 8.0  | Human TMEV-like cardiovirus                                                                                                         |
| 9627425      | 4.0  | Enterobacteria phage T7                                                                                                             |
| 56718463     | 2.0  | Enterobacteria phage M13                                                                                                            |
| 155573622    | 1.0  | Human herpesvirus 5                                                                                                                 |
| 46401626     | 1.0  | Enterobacteria phage P1                                                                                                             |
| 9626096      | 1.0  | Friend murine leukemia virus: Retro-transcribing viruses; Retroviridae; Orthoretrovirinae; Gammaretrovirus; Murine leukemia virus.  |
| Total shown: | 45.0 |                                                                                                                                     |

### Dataset C, barcode CGT

Number of viruses with matches: 20  
 Number of reads with viral matches: 302  
 Percent of total dataset: 0.012%

###

Top viral matches (genome GI, match-normalized read count, virus description):

|              |       |                                                                                                                                      |
|--------------|-------|--------------------------------------------------------------------------------------------------------------------------------------|
| 9626958      | 244.0 | Moloney murine leukemia virus: Retro-transcribing viruses; Retroviridae; Orthoretrovirinae; Gammaretrovirus; Murine leukemia virus.  |
| 9629514      | 20.0  | Rauscher murine leukemia virus: Retro-transcribing viruses; Retroviridae; Orthoretrovirinae; Gammaretrovirus; Murine leukemia virus. |
| 254305431    | 14.0  | Human klassevirus 1                                                                                                                  |
| 238821317    | 2.0   | Streptococcus phage PH10                                                                                                             |
| 209427726    | 2.0   | Enterobacteria phage YYZ-2008                                                                                                        |
| 46401626     | 2.0   | Enterobacteria phage P1                                                                                                              |
| 29366675     | 2.0   | Enterobacteria phage T4                                                                                                              |
| 12408699     | 2.0   | Poliovirus                                                                                                                           |
| 9628654      | 2.0   | Murine type C retrovirus: Retro-transcribing viruses; Retroviridae; Orthoretrovirinae; Gammaretrovirus; Murine leukemia virus.       |
| 9627425      | 2.0   | Enterobacteria phage T7                                                                                                              |
| Total shown: | 292.0 |                                                                                                                                      |

### Dataset C, barcode CTG

Number of viruses with matches: 1  
 Number of reads with viral matches: 2  
 Percent of total dataset: 0.00006%

###

Top viral matches (genome GI, match-normalized read count, virus description):

|              |     |                                                                                                                                      |
|--------------|-----|--------------------------------------------------------------------------------------------------------------------------------------|
| 9629514      | 2.0 | Rauscher murine leukemia virus: Retro-transcribing viruses; Retroviridae; Orthoretrovirinae; Gammaretrovirus; Murine leukemia virus. |
| Total shown: | 2.0 |                                                                                                                                      |

### Dataset C, barcode GAG

Number of viruses with matches: 3  
 Number of reads with viral matches: 42  
 Percent of total dataset: 0.0007%

###

Top viral matches (genome GI, match-normalized read count, virus description):

|              |      |                                                                                                                                      |
|--------------|------|--------------------------------------------------------------------------------------------------------------------------------------|
| 9629514      | 33.0 | Rauscher murine leukemia virus: Retro-transcribing viruses; Retroviridae; Orthoretrovirinae; Gammaretrovirus; Murine leukemia virus. |
| 9626096      | 7.0  | Friend murine leukemia virus: Retro-transcribing viruses; Retroviridae; Orthoretrovirinae; Gammaretrovirus; Murine leukemia virus.   |
| 148727082    | 2.0  | Propionibacterium phage PA6                                                                                                          |
| Total shown: | 42.0 |                                                                                                                                      |

**Supplemental File S2 (continued).** Composition of viral sequences. The ten viruses with the greatest number of read matches from are shown for each dataset.

### Dataset C, barcode GCT

Number of viruses with matches: 2  
 Number of reads with viral matches: 6  
 Percent of total dataset: 0.0002%

###

Top viral matches (genome GI, match-normalized read count, virus description):

|              |     |                              |
|--------------|-----|------------------------------|
| 27531786     | 5.0 | Human papillomavirus type 92 |
| 83642839     | 1.0 | Ovine herpesvirus 2          |
| Total shown: | 6.0 |                              |

### Dataset C, barcode GGA

Number of viruses with matches: 1  
 Number of reads with viral matches: 1  
 Percent of total dataset: 0.00002%

###

Top viral matches (genome GI, match-normalized read count, virus description):

|              |     |                                                                                          |
|--------------|-----|------------------------------------------------------------------------------------------|
| 73852470     | 1.0 | Emiliana huxleyi virus 86: dsDNA viruses, no RNA stage; Phycodnaviridae; Coccolithovirus |
| Total shown: | 1.0 |                                                                                          |

### Dataset C, barcode GTC

Number of viruses with matches: 4  
 Number of reads with viral matches: 19  
 Percent of total dataset: 0.0006%

###

Top viral matches (genome GI, match-normalized read count, virus description):

|              |      |                                                                                             |
|--------------|------|---------------------------------------------------------------------------------------------|
| 158976983    | 10.0 | Dengue virus type 2                                                                         |
| 189418893    | 4.0  | Human TMEV-like cardiovirus                                                                 |
| 9630726      | 4.0  | Human astrovirus: ssRNA positive-strand viruses, no DNA stage; Astroviridae; Mamastrovirus. |
| 12408699     | 1.0  | Poliovirus                                                                                  |
| Total shown: | 19.0 |                                                                                             |

### Dataset C, barcode TAT

Number of viruses with matches: 13  
 Number of reads with viral matches: 80  
 Percent of total dataset: 0.004%

###

Top viral matches (genome GI, match-normalized read count, virus description):

|              |      |                                                                                                                                      |
|--------------|------|--------------------------------------------------------------------------------------------------------------------------------------|
| 148727082    | 31.0 | Propionibacterium phage PA6                                                                                                          |
| 9626958      | 17.0 | Moloney murine leukemia virus: Retro-transcribing viruses; Retroviridae; Orthoretrovirinae; Gammaretrovirus; Murine leukemia virus.  |
| 29366675     | 9.0  | Enterobacteria phage T4                                                                                                              |
| 9629514      | 5.0  | Rauscher murine leukemia virus: Retro-transcribing viruses; Retroviridae; Orthoretrovirinae; Gammaretrovirus; Murine leukemia virus. |
| 32469420     | 4.0  | Streptococcus phage SM1                                                                                                              |
| 9634119      | 3.0  | Enterobacteria phage HK022                                                                                                           |
| 254305431    | 2.0  | Human klassevirus 1                                                                                                                  |
| 209427726    | 2.0  | Enterobacteria phage YYZ-2008                                                                                                        |
| 9628421      | 2.0  | Simian virus 40: dsDNA viruses, no RNA stage; Polyomaviridae; Polyomavirus                                                           |
| 9626243      | 2.0  | Enterobacteria phage lambda                                                                                                          |
| Total shown: | 77.0 |                                                                                                                                      |

### Dataset C, barcode TCG

Number of viruses with matches: 4  
 Number of reads with viral matches: 4  
 Percent of total dataset: 0.00007%

###

Top viral matches (genome GI, match-normalized read count, virus description):

|              |        |                                                                                                                                     |
|--------------|--------|-------------------------------------------------------------------------------------------------------------------------------------|
| 146261990    | 2.0    | Murid herpesvirus 4                                                                                                                 |
| 89889045     | 0.6667 | Xenotropic MuLV-related virus VP62: Retro-transcribing viruses; Retroviridae; Orthoretrovirinae; Gammaretrovirus.                   |
| 9626958      | 0.6667 | Moloney murine leukemia virus: Retro-transcribing viruses; Retroviridae; Orthoretrovirinae; Gammaretrovirus; Murine leukemia virus. |
| 9626096      | 0.6667 | Friend murine leukemia virus: Retro-transcribing viruses; Retroviridae; Orthoretrovirinae; Gammaretrovirus; Murine leukemia virus.  |
| Total shown: | 4.0    |                                                                                                                                     |

### Dataset C, barcode TGC

Number of viruses with matches: 0  
 Number of reads with viral matches: 0  
 Percent of total dataset: 0%

**Supplemental File S2 (continued).** Composition of viral sequences. The ten viruses with the greatest number of read matches from are shown for each dataset.

```

### Dataset C, barcode TTA
Number of viruses with matches:      6
Number of reads with viral matches:  1132
Percent of total dataset: 0.072%
###
Top viral matches (genome GI, match-normalized read count, virus description):
9627100      916.0   Human papillomavirus type 16
39653674     174.0   Streptococcus prophage EJ-1
254305431    26.0    Human klassevirus 1
9626243      8.0     Enterobacteria phage lambda
148727082    6.0     Propionibacterium phage PA6
9626958      2.0     Moloney murine leukemia virus: Retro-transcribing viruses; Retroviridae; Orthoretrovirinae;
          Gammaretrovirus; Murine leukemia virus.
Total shown: 1132.0

```

**Supplemental File S3.** Viral genome database records (do not print: read/search/zoom on your computer).

[illegible]



**Supplemental File S3 (continued).** Viral genome database records (do not print: read/search/zoom on your computer).

[illegible]



**Supplemental File S3 (continued).** Viral genome database records (do not print: read/search/zoom on your computer).

[illegible]

**Supplemental File S3 (continued).** Viral genome database records (do not print: read/search/zoom on your computer).

[illegible]

**Supplemental File S3 (continued).** Viral genome database records (do not print: read/search/zoom on your computer).

[illegible]



# Supplemental File S3 (continued). Viral genome database records (do not print: read/search/zoom on your computer).

g|10851429[gb][NC\_008057.1][NC\_008057 Tomato golden mottle virus DNA B, complete sequence.

g|108518227[gb][NC\_008058.1][NC\_008058 Tomato golden mottle virus DNA A, complete sequence.

g|250657512[gb][NC\_012328.1][NC\_012328 Tomato infectious chlorosis virus RNA 1, complete genome.

g|250676984[gb][NC\_012329.1][NC\_012329 Tomato infectious chlorosis virus RNA 2, complete genome.

g|124503105[gb][NC\_009309.1][NC\_009309 Tomato leaf curl Krishna virus DNA, complete sequence.

g|21165975[gb][NC\_003891.1][NC\_003891 Tomato leaf curl Bangalore virus, complete genome.

g|142299573[gb][NC\_010439.1][NC\_010439 Tomato leaf curl Bangalore virus-2011 satellite DNA beta, complete genome.

g|20897167[gb][NC\_004614.1][NC\_004614 Tomato leaf curl Bangladesh virus, complete genome.

g|281373254[gb][NC\_013439.1][NC\_013439 Tomato leaf curl Cameroon virus - [Cameroon/BuwaOkara2009], complete genome.

g|146922861[gb][NC\_008729.1][NC\_008729 Tomato leaf curl Cabo Verde virus, complete genome.

g|408047427[gb][NC\_005320.1][NC\_005320 Tomato leaf curl China virus - [G2], complete genome.

g|47270092[gb][NC\_006270.1][NC\_006270 Tomato leaf curl China virus satellite DNA beta, complete genome.

g|169928575[gb][NC\_010441.1][NC\_010441 Tomato leaf curl Guangdong virus DNA-A, complete sequence.

g|115325270[gb][NC\_008373.1][NC\_008373 Tomato leaf curl Changbai virus DNA-A, complete sequence.

g|114467325[gb][NC\_008378.1][NC\_008378 Tomato leaf curl Changai virus, complete genome.

g|28209379[gb][NC\_004558.1][NC\_004558 Tomato leaf curl Gujart virus - [Varanasi] segment A, complete sequence.

g|28209386[gb][NC\_004559.1][NC\_004559 Tomato leaf curl Gujart virus - [Varanasi] segment B, complete sequence.

g|255993864[gb][NC\_013102.1][NC\_013102 Tomato leaf curl Indian virus, complete genome.

g|121641345[gb][NC\_008727.1][NC\_008727 Tomato leaf curl Hainan virus - [Taiwan/Hsinchu2005] DNA A, complete sequence.

g|146259749[gb][NC\_005882.1][NC\_005882 Tomato leaf curl Iran virus, complete genome.

g|32493242[gb][NC\_005031.1][NC\_005031 Tomato leaf curl Java virus, complete genome.

g|42733078[gb][NC\_005497.1][NC\_005497 Tomato leaf curl Java virus-[Japanum] satellite DNA, complete genome.

g|85648785[gb][NC\_007723.1][NC\_007723 Tomato leaf curl Jeydypur beta virus DNA-A, complete sequence.

g|146315193[gb][NC\_010236.1][NC\_010236 Tomato leaf curl Jeydypur beta virus, complete genome.

g|21218470[gb][NC\_003897.1][NC\_003897 Tomato leaf curl Karnataka virus, complete genome.

g|116264054[gb][NC\_008523.1][NC\_008523 Tomato leaf curl Karnataka virus-associated DNA beta DNA-A, complete sequence.

g|136048395[gb][NC\_011335.1][NC\_011335 Tomato leaf curl Kerala virus, complete genome.

g|139535989[gb][NC\_011096.1][NC\_011096 Tomato leaf curl Kusmura virus segment A, complete sequence.

g|20876184[gb][NC\_004413.1][NC\_004413 Tomato leaf curl Laos virus, complete genome.

g|46082931[gb][NC\_004448.1][NC\_004448 Tomato leaf curl Madagascar virus, complete genome.

g|29254559[gb][NC\_004448.1][NC\_004448 Tomato leaf curl Malaysia virus, complete genome.

g|41057311[gb][NC\_005348.1][NC\_005348 Tomato leaf curl Mali virus, complete genome.

g|60839346[gb][NC\_006876.1][NC\_006876 Tomato leaf curl Mayotte virus, complete genome.

g|146922868[gb][NC\_010440.1][NC\_010440 Tomato leaf curl Mladovo virus, complete genome.

g|28727824[gb][NC\_004411.1][NC\_004411 Tomato leaf curl New Delhi virus DNA A, complete sequence.

g|28728779[gb][NC\_004412.1][NC\_004412 Tomato leaf curl New Delhi virus DNA B, complete sequence.

g|41227764[gb][NC\_005359.1][NC\_005359 Tomato leaf curl New Delhi virus-associated DNA beta DNA-A, complete genome.

g|284088990[gb][NC\_012206.1][NC\_012206 Tomato leaf curl Nigeria virus-[Nigeria2004], complete genome.

g|215919727[gb][NC\_010484.1][NC\_010484 Tomato leaf curl Pakistan virus, complete genome.

g|239764609[gb][NC\_012789.1][NC\_012789 Tomato leaf curl Pakistan virus associated DNA 1, complete genome.

g|190336519[gb][NC\_010389.1][NC\_010389 Tomato leaf curl Palampur virus, complete genome.

g|190336522[gb][NC\_010390.1][NC\_010390 Tomato leaf curl Palampur virus, complete genome.

g|236202299[gb][NC\_012492.1][NC\_012492 Tomato leaf curl Patna virus DNA-A, complete genome.

g|236223249[gb][NC\_012493.1][NC\_012493 Tomato leaf curl Patna virus satellite DNA beta, complete genome.

g|146877233[gb][NC\_009570.1][NC\_009570 Tomato leaf curl Philippines virus satellite DNA beta, complete genome.

g|23493271[gb][NC\_005032.1][NC\_005032 Tomato leaf curl Philippines virus, complete genome.

g|12615317[gb][NC\_003898.1][NC\_003898 Tomato leaf curl Pune virus, complete genome.

g|162301754[gb][NC\_009031.1][NC\_009031 Tomato leaf curl Seychelles virus, complete genome.

g|146988408[gb][NC\_009605.1][NC\_009605 Tomato leaf curl Sinaloa virus DNA A, complete sequence.

g|149986611[gb][NC\_009606.1][NC\_009606 Tomato leaf curl Sinaloa virus DNA A, complete sequence.

g|29267566[gb][NC\_004647.1][NC\_004647 Tomato leaf curl Sri Lanka virus, complete genome.

g|46395057[gb][NC\_005853.1][NC\_005853 Tomato leaf curl Sudan virus - [Gairali], complete genome.

g|261420948[gb][NC\_013143.1][NC\_013143 Tomato leaf curl Sulawesi virus DNA-A, complete genome.

g|21218477[gb][NC\_003899.1][NC\_003899 Tomato leaf curl Taiwan virus, complete genome.

g|234880883[gb][NC\_012205.1][NC\_012205 Tomato leaf curl Togo virus-[Togo2006], complete genome.

g|22769704[gb][NC\_004133.1][NC\_004133 Tomato leaf curl Vietnam virus DNA A, complete genome.

g|21184631[gb][NC\_005033.1][NC\_005033 Tomato leaf curl virus, complete genome.

g|167460005[gb][NC\_010313.1][NC\_010313 Tomato leaf curl virus-Dhana virus segment A, complete sequence.

g|113264054[gb][NC\_008524.1][NC\_008524 Tomato leaf curl virus-Dhana-associated DNA beta DNA-A, complete sequence.

g|29742058[gb][NC\_004715.1][NC\_004715 Tomato leaf curl virus-associated DNA beta, complete genome.

g|13631416[gb][NC\_007274.1][NC\_007274 Tomato leaf curl virus satellite DNA, complete genome.

g|195641463[gb][NC\_010987.1][NC\_010987 Tomato archizitr virus RNA 1, complete sequence.

g|195643471[gb][NC\_010988.1][NC\_010988 Tomato archizitr virus RNA 2, complete sequence.

g|190336584[gb][NC\_010810.1][NC\_010810 Tomato molic virus DNA-A, complete sequence.

g|190336584[gb][NC\_010810.1][NC\_010810 Tomato molic virus DNA-B, complete sequence.

g|190336584[gb][NC\_010810.1][NC\_010810 Tomato molic virus DNA-C, complete sequence.

g|146823132[gb][NC\_009491.1][NC\_009491 Tomato molic yellow leaf curl Argas virus DNA B, complete sequence.

g|146823132[gb][NC\_009491.1][NC\_009491 Tomato molic yellow leaf curl Argas virus DNA B, complete sequence.

g|100560520[gb][NC\_003867.1][NC\_003867 Tomato molic Navas virus DNA A, complete sequence.

g|208952636[gb][NC\_003868.1][NC\_003868 Tomato molic Navas virus DNA B, complete sequence.

g|46193104[gb][NC\_005850.1][NC\_005850 Tomato molic leaf curl virus DNA A, complete genome.

g|46193110[gb][NC\_005851.1][NC\_005851 Tomato molic leaf curl virus DNA B, complete genome.

g|13357204[gb][NC\_002922.1][NC\_002922 Tomato molic virus, complete genome.

g|28796346[gb][NC\_001828.1][NC\_001828 Tomato mottle Taiwo virus DNA A, complete sequence.

g|28796346[gb][NC\_001829.1][NC\_001829 Tomato mottle Taiwo virus DNA B, complete sequence.

g|19620999[gb][NC\_001938.1][NC\_001938 Tomato mottle virus DNA A, complete sequence.

g|19620999[gb][NC\_001939.1][NC\_001939 Tomato mottle virus DNA B, complete sequence.

g|20561441[gb][NC\_003825.1][NC\_003825 Tomato pseudo-ruby top virus, complete genome.

g|111564125[gb][NC\_003839.1][NC\_003839 Tomato ringspot virus RNA 2, complete sequence.

g|205614351[gb][NC\_003840.1][NC\_003840 Tomato ringspot virus RNA 1, complete sequence.

g|10518470[gb][NC\_002555.1][NC\_002555 Tomato rugose mosaic virus DNA A, complete sequence.

g|10518476[gb][NC\_002556.1][NC\_002556 Tomato rugose mosaic virus DNA B, complete sequence.

g|29143836[gb][NC\_004642.1][NC\_004642 Tomato severe leaf curl virus, complete genome.

g|149898261[gb][NC\_009607.1][NC\_009607 Tomato severe rugose virus DNA A, complete sequence.

g|149898261[gb][NC\_009608.1][NC\_009608 Tomato severe rugose virus DNA B, complete sequence.

g|9623867[gb][NC\_002050.1][NC\_002050 Tomato spotted wilt virus RNA B, complete sequence.

g|9623867[gb][NC\_002051.1][NC\_002051 Tomato spotted wilt virus RNA C, complete sequence.

g|9623867[gb][NC\_002052.1][NC\_002052 Tomato spotted wilt virus RNA L, complete sequence.

g|126193184[gb][NC\_009013.1][NC\_009013 Tomato torrado virus RNA1, complete sequence.

g|126193184[gb][NC\_009014.1][NC\_009014 Tomato torrado virus RNA2, complete sequence.

g|157397074[gb][NC\_008993.1][NC\_008993 Tomato yellow dwarf disease associated satellite DNA beta-[Kochi] virus, complete genome.

g|21584412[gb][NC\_004644.1][NC\_004644 Tomato yellow leaf curl Kanchanaburi virus, complete genome.

g|33438959[gb][NC\_005058.1][NC\_005058 Tomato yellow leaf curl China virus associated DNA 1, complete genome.

g|27868424[gb][NC\_004644.1][NC\_004644 Tomato yellow leaf curl China virus satellite DNA beta, complete genome.

g|113503644[gb][NC\_008728.1][NC\_008728 Tomato yellow leaf curl Guangdong virus DNA-A, complete sequence.

g|111118951[gb][NC\_008267.1][NC\_008267 Tomato yellow leaf curl Indonesia virus-[Lembang], complete genome.

g|45445700[gb][NC\_005883.1][NC\_005883 Tomato yellow leaf curl Kanchanaburi virus DNA B, complete sequence.

g|45445708[gb][NC\_005812.1][NC\_005812 Tomato yellow leaf curl Kanchanaburi virus DNA A, complete sequence.

g|28280571[gb][NC\_004649.1][NC\_004649 Tomato yellow leaf curl Malaga virus, complete genome.

g|229902269[gb][NC\_007485.1][NC\_007485 Tomato yellow leaf curl Mali virus-associated DNA beta, complete genome.

g|25064204[gb][NC\_003828.1][NC\_003828 Tomato yellow leaf curl Sardinia virus, complete genome.

g|28135861[gb][NC\_010441.1][NC\_010441 Tomato yellow leaf curl Thailand betasatellite - [India/Chhabad2009], complete genome.

g|19623881[gb][NC\_008989.1][NC\_008989 Tomato yellow leaf curl Thailand virus DNA A, complete sequence.

g|19623881[gb][NC\_008990.1][NC\_008990 Tomato yellow leaf curl Thailand virus DNA B, complete sequence.

g|33438961[gb][NC\_005059.1][NC\_005059 Tomato yellow leaf curl Thailand virus associated DNA 1, complete genome.

g|23140175[gb][NC\_004903.1][NC\_004903 Tomato yellow leaf curl Thailand virus satellite DNA beta, complete genome.

g|148744637[gb][NC\_009548.1][NC\_009548 Tomato yellow leaf curl Vietnam virus DNA-A, complete sequence.

g|14828660[gb][NC\_009540.1][NC\_009540 Tomato yellow leaf curl Vietnam virus satellite DNA beta, complete genome.

g|21265900[gb][NC\_010400.1][NC\_010400 Tomato yellow leaf curl virus, complete genome.

g|161984671[gb][NC\_010126.1][NC\_010126 Tomato yellow leaf curl virus-associated DNA beta, complete genome.

g|46193113[gb][NC\_005852.1][NC\_005852 Tomato yellow margin leaf curl virus DNA A, complete genome.

g|46193119[gb][NC\_005853.1][NC\_005853 Tomato yellow margin leaf curl virus DNA B, complete genome.

g|85467899[gb][NC\_007726.1][NC\_007726 Tomato yellow spot virus DNA-A, complete genome.

g|85467904[gb][NC\_007727.1][NC\_007727 Tomato yellow spot virus DNA-B, complete genome.

g|190336480[gb][NC\_010949.1][NC\_010949 Tomato yellow vein streak virus DNA-A, complete genome.

g|190336488[gb][NC\_010950.1][NC\_010950 Tomato yellow vein streak virus DNA-B, complete genome.

g|178676268[gb][NC\_010489.1][NC\_010489 Tomato zonate spot virus segment 8, complete sequence.

g|178676274[gb][NC\_010490.1][NC\_010490 Tomato zonate spot virus segment 9, complete sequence.

g|178676274[gb][NC\_010491.1][NC\_010491 Tomato zonate spot virus segment 10, complete sequence.

g|134133204[gb][NC\_009225.1][NC\_009225 Torque teno midi virus, complete genome.

g|2902321[gb][NC\_002076.1][NC\_002076 TT virus, complete genome.

g|13399231[gb][NC\_002386.1][NC\_002386 Transmissible gastroenteritis virus, complete genome.

g|27228471[gb][NC\_004453.1][NC\_004453 Tree shrew adenovirus, complete genome.

g|29433028[gb][NC\_003783.1][NC\_003783 Trichomonas tritumoni, complete genome.

g|56698748[gb][NC\_005663.1][NC\_005663 Trichomonas annatus latirostris papillomavirus type 1, complete genome.

g|20684174[gb][NC\_003824.1][NC\_003824 Trichomonas vaginalis virus, complete genome.

g|21450640[gb][NC\_004634.1][NC\_004634 Trichomonas vaginalis virus 1, complete genome.

g|20899358[gb][NC\_003873.1][NC\_003873 Trichomonas vaginalis virus 1, complete genome.

g|7429484[gb][NC\_003783.1][NC\_003783 Trichopeltis DMSP, complete genome.

g|116246687[gb][NC\_008518.1][NC\_008518 Trichoplusia ni ascovirus 2c, complete genome.

g|10518479[gb][NC\_002557.1][NC\_002557 Trichoplusia ni cytoplasmic polyhedrosis virus 15 segment 1, complete sequence.

g|10518480[gb][NC\_002558.1][NC\_002558 Trichoplusia ni cytoplasmic polyhedrosis virus 15 segment 2, complete sequence.

g|10518481[gb][NC\_002559.1][NC\_002559 Trichoplusia ni cytoplasmic polyhedrosis virus 15 segment 3, complete sequence.

g|10518482[gb][NC\_002560.1][NC\_002560 Trichoplusia ni cytoplasmic polyhedrosis virus 15 segment 4, complete sequence.

g|10518483[gb][NC\_002561.1][NC\_002561 Trichoplusia ni cytoplasmic polyhedrosis virus 15 segment 5, complete sequence.

g|10518484[gb][NC\_002562.1][NC\_002562 Trichoplusia ni cytoplasmic polyhedrosis virus 15 segment 6, complete sequence.

g|10518485[gb][NC\_002563.1][NC\_002563 Trichoplusia ni cytoplasmic polyhedrosis virus 15 segment 7, complete sequence.

g|10518486[gb][NC\_002564.1][NC\_002564 Trichoplusia ni cytoplasmic polyhedrosis virus 15 segment 8, complete sequence.

g|10518487[gb][NC\_002565.1][NC\_002565 Trichoplusia ni cytoplasmic polyhedrosis virus 15 segment 9, complete sequence.

g|10518488[gb][NC\_002566.1][NC\_002566 Trichoplusia ni cytoplasmic polyhedrosis virus 15 segment 10, complete sequence.

g|10518489[gb][NC\_002567.1][NC\_002567 Trichoplusia ni cytoplasmic polyhedrosis virus 15 segment 11, complete sequence.

g|10518490[gb][NC\_002568.1][NC\_002568 Trichoplusia ni cytoplasmic polyhedrosis virus 15 segment 12, complete sequence.

g|23982679[gb][NC\_012799.1][NC\_012799 Trilium mosaic virus, complete genome.

g|38488686[gb][NC\_005226.1][NC\_005226 Tulia virus segment 1, complete sequence.

g|38488688[gb][NC\_005227.1][NC\_005227 Tulia virus segment 8, complete sequence.

g|38488690[gb][NC\_005228.1][NC\_005228 Tulia virus segment 9, complete sequence.

g|20564212[gb][NC\_003873.1][NC\_003873 Tulare apple mosaic virus RNA1, complete sequence.

g|20564215[gb][NC\_003874.1][NC\_003874 Tulare apple mosaic virus RNA2, complete sequence.

g|20564218[gb][NC\_003875.1][NC\_003875 Tulare apple mosaic virus RNA3, complete sequence.

g|23178628[gb][NC\_004322.1][NC\_004322 Tulip virus X, complete genome.

g|19634948[gb][NC\_002199.1][NC\_002199 Tulipa parryoxvirus, complete genome.

g|46086427[gb][NC\_007020.1][NC\_007020 Tulipa virus, complete genome.

g|14250967[gb][NC\_002794.1][NC\_002794 Tupaiid herpesvirus 1, complete genome.

g|19630779[gb][NC\_001959.1][NC\_001959 Turkey adenovirus A, complete genome.

g|196305749[gb][NC\_002470.1][NC\_002470 Turkey astrovirus, complete genome.

g|45239034[gb][NC\_005790.1][NC\_005790 Turkey astrovirus 2, complete genome.

g|18031368[gb][NC\_010800.1][NC\_010800 Turkey coronavirus, complete genome.

g|74007769[gb][NC\_003021.1][NC\_003021 Turnip crinkle virus, complete genome.

g|21430551[gb][NC\_004033.1][NC\_004033 Turnip crinkle virus satellite RNA, complete genome.

g|55833391[gb][NC\_004643.1][NC\_004643 Turnip crinkle virus satellite RNA C, complete genome.

g|5647093[gb][NC\_002059.1][NC\_002059 Turnip crinkle mosaic virus, complete genome.

g|25778352[gb][NC\_013128.1][NC\_013128 Turnip ringspot virus RNA 1, complete genome.

g|25778354[gb][NC\_013129.1][NC\_013129 Turnip ringspot virus RNA 2, complete genome.

g|28144357[gb][NC\_004653.1][NC\_004653 Turnip ringspot virus, complete genome.

g|19623939[gb][NC\_011873.1][NC\_011873 Turnip vein-clearing virus, complete genome.

g|21686950[gb][NC\_004063.1][NC\_004063 Turnip yellow mosaic virus, complete genome.

g|26428711[gb][NC\_003742.1][NC\_003742 Turnip yellows virus, complete genome.

g|195661184[gb][NC\_011019.1][NC\_011019 Turnipso truncatus papillomavirus type 1, complete genome.

g|109393374[gb][NC\_008284.1][NC\_008284 Turnipso truncatus papillomavirus type 2, complete genome.

g|195661192[gb][NC\_011010.1][NC\_011010 Turnipso truncatus papillomavirus type 3, complete genome.

g|1962772[gb][NC\_001616.1][NC\_001616 Utrunc virus, complete genome.

g|189303447[gb][NC\_010787.1][NC\_010787 Utrunc virus, complete genome.

g|18904078[gb][NC\_010739.1][NC\_010739 Utrunc virus maritimus papillomavirus type 1, complete genome.

g|20564172[gb][NC\_005623.1][NC\_005623 Utrunc virus maritimus papillomavirus type 1, complete genome.

g|56492441[gb][NC\_005653.1][NC\_005653 Utrunc virus, complete genome.

g|38373701[gb][NC\_005214.1][NC\_005214 Ukukuniemi virus segment 1, complete sequence.

g|38373703[gb][NC\_005215.1][NC\_005215 Ukukuniemi virus chromosome segment 8, complete sequence.

g|38373707[gb][NC\_005221.1][NC\_005221 Ukukuniemi virus, complete genome.

g|46270797[gb][NC\_005896.1][NC\_005896 Vaccinia virus, complete genome.

g|19625721[gb][NC\_001611.1][NC\_001611 Variola virus, complete genome.

g|56121875[gb][NC\_004894.1][NC\_004894 Varroa destructor virus 1, complete genome.

g|26159784[gb][NC\_013144.1][NC\_013144 Velvet bean severe mosaic virus DNA A, complete genome.

g|261597702[gb][NC\_013145.1][NC\_013145 Velvet bean severe mosaic virus DNA B, complete genome.

g|21224419[gb][NC\_003906.1][NC\_003906 Velvet tobacco mottle virus satellite DNA, complete genome.

g|19625626[gb][NC\_001449.1][NC\_001449 Venezuelan equine encephalitis virus, complete genome.

g|189089874[gb][NC\_010735.1][NC\_010735 Varzea virus Y, complete genome.

g|270358405[gb][NC\_013423.1][NC\_013423 Vernonia yellow vein betasatellite, complete genome.

g|85718606[gb][NC\_007730.1][NC\_007730 Vernonia yellow vein virus DNA-A, complete sequence.

g|10114055[gb][NC\_002551.1][NC\_002551 Vesicular exanthema of salmon virus, complete genome.

g|19627229[gb][NC\_001560.1][NC\_001560 Vesicular stomatitis Indiana virus, complete genome.

g|17975105[gb][NC\_003313.1][NC\_003313 Vibriophages K139, complete genome.

g|52271121[gb][NC\_006284.1][NC\_006284 Vibriophages K219, complete genome.

g|91214232[gb][NC\_005083.1][NC\_005083 Vibriophages K240, complete genome.

g|28143165[gb][NC\_013653.1][NC\_013653 Vibriophages K4, complete genome.

g|23882132[gb][NC\_012757.1][NC\_012757 Vibriophages W3p1, complete genome.

g|38039743[gb][NC\_004736.1][NC\_004736 Vibriophages W3p1, complete genome.

g|27111175[gb][NC\_004656.1][NC\_004656 Vibriophages W3p1, complete genome.

g|48966638[gb][NC\_005879.1][NC\_005879 Vibriophages W3p1, complete genome.

g|48966638[gb][NC\_005880.1][NC\_005880 Vibriophages W3p1, complete genome.

g|12601844[gb][NC\_009016.1][NC\_009016 Vibriophages W3p2, complete genome.

g|2126624[gb][NC\_012662.1][NC\_012662 Vibriophages W3p3, complete genome.

g|24116413[gb][NC\_012377.1][NC\_012377 Vibriophages W3p4, complete genome.

g|49248530[gb][NC\_005849.1][NC\_005849 Vibriophages W3p5, complete genome.

g|49248531[gb][NC\_005850.1][NC\_005850 Vibriophages W3p6, complete genome.

g|19353467[gb][NC\_002634.1][NC\_002634 Vibriophages W3p7, complete genome.

g|234505712[gb][NC\_004306.1][NC\_004306 Vibriophages W3p8, complete genome.

g|830761[gb][NC\_001956.1][NC\_001956 Vibriophages W3p9, complete genome.

g|16597214[gb][NC\_010275.1][NC\_010275 Vibriophages W3p10, complete genome.

g|48299727[gb][NC\_007149.1][NC\_007149 Vibriophages W3p11, complete genome.

g|21239372[gb][NC\_003709.1][NC\_003709 Vibriophages W3p12, complete genome.

g|71658956[gb][NC\_007241.1][NC\_007241 Vicia cryptica virus RNA1, complete sequence.

g|71658958[gb][NC\_007242.1][NC\_007242 Vicia cryptica virus RNA2, complete sequence.

g|83700339[gb][NC\_007648.1][NC\_007648 Vicia endorhiza virus, complete genome.

g|9632550[gb][NC\_008085.1][NC\_008085 Vicia hemerocarpia septoria virus, complete genome.

g|21239373[gb][NC\_003710.1][NC\_003710 Vicia phaseolus virus, complete genome.

g|148724565[gb][NC\_005939.1][NC\_005939 Vicia polymorpha, complete genome.

g|16299024[gb][NC\_001867.1][NC\_001867 Walleye dermal sarcoma virus, complete genome.

g|27838448[gb][NC\_003681.1][NC\_003681 Walleye dermal sarcoma virus, complete genome.

g|20279330[gb][NC\_003708.1][NC\_003708 Watermelon chlorotic stunt virus DNA A, complete sequence.

g|20279331[gb][NC\_003709.1][NC\_003709 Watermelon chlorotic stunt virus DNA B, complete sequence.

g|51949455[gb][NC\_006622.1][NC\_006622 Watermelon mosaic virus, complete genome.

g|20548416[gb][NC\_003832.1][NC\_003832 Watermelon spotted wilt virus segment 1, complete sequence.

g|20548419[gb][NC\_003833.1][NC\_003833 Watermelon spotted wilt virus segment 8, complete sequence.

g|20548421[gb][NC\_003834.1][NC\_003834 Watermelon spotted wilt virus segment 9, complete sequence.

g|238081614[gb][NC\_012735.1][NC\_012735 Watermelon virus, complete genome.

g|11528013[gb][NC\_001563.2][NC\_001563 Wheat little virus (lineage T1 strain V5), complete genome.

g|158516887[gb][NC\_009942.1][NC\_009942 Wheat little virus (lineage T1 strain W79), complete genome.

g|27829529[gb][NC\_012931.1][NC\_012931 Wheat yellow dwarf virus-WPV, complete genome.

g|19426804[gb][NC\_010101.1][NC\_010101 Western rooster papillomavirus 1, complete genome.

g|18071198[gb][NC\_003364.1][NC\_003364 Wheat dwarf virus, complete genome.

g|15765283[gb][NC\_009805.1][NC\_009805 Wheat egiid mosaic virus, complete genome.

g|9630351[gb][NC\_001886.1][NC\_001886 Wheat streak mosaic virus, complete genome.

g|21238448[gb][NC\_003908.1][NC\_003908 Wheat yellow dwarf virus-WPV, complete genome.

g|963426[gb][NC\_002349.1][NC\_002349 Wheat yellow mosaic virus RNA 2, complete sequence.

g|963426[gb][NC\_002349.1][NC\_002349 Wheat yellow mosaic virus RNA 3, complete sequence.

g|21267175[gb][NC\_015133.1][NC\_015133 White ash mosaic virus, complete genome.

g|11647184[gb][NC\_003909.1][NC\_003909 White clover mosaic virus, complete genome.

g|5220808[gb][NC\_006275.1][NC\_006275 White clover mosaic virus 1 RNA1, complete sequence.

g|5220808[gb][NC\_006276.1][NC\_006276 White clover mosaic virus 1 RNA2, complete sequence.

g|18933117[gb][NC\_010700.1][NC\_010700 Whitewater Arroyo virus segment 8, complete sequence.

g|18933117[gb][NC\_010701.1][NC\_010701 Whitewater Arroyo virus segment 9, complete sequence.

g|25140980[gb][NC\_004426.1][NC\_004426 Wild potato mosaic virus, complete genome.

g|156474521[gb][NC\_009744.1][NC\_009744 Wild tomato mosaic virus, complete genome.

g|190336465[gb][NC\_010948.1][NC\_010948 Wisconsin golden mosaic II Thomas Virus DNA A, complete sequence.

g|190336471[gb][NC\_010951.1][NC\_010951 Wisconsin golden mosaic II Thomas Virus DNA B, complete sequence.

g|21647098[gb][NC\_007216.1][NC\_007216 Wisteria vein mosaic virus, complete genome.

g|21647098[gb][NC\_007217.1][NC\_007217 Wisteria vein mosaic virus, complete genome.

g|22265040[gb][NC\_004107.1][NC\_004107 Woodchuck hepatitis virus, complete genome.

g|182848521[gb][NC\_00
